# Supplementary material
Source: publisher site journal article supplement (https://www.dovepress.com/get_supplementary_file.php?f=346365.docx)
Supplement: Supplementary file 1 [file get_supplementary_file.php]

**Supplementary S1**

| **Reagents/kits** | **Company** | **Cat No.** | **Lot No.** |
| --- | --- | --- | --- |
| CII | Chondex | 20021 | 180390 |
| IFA | Chondex | 7002 | 200079 |
| GM-CSF ELISA kit | Multi-Science | 70-EK363 | A36391152 |
| IL-1β ELISA kit | Multi-Science | 70-EK301B/3 | A301B10214 |
| IL-17α ELISA kit | Multi-Science | 70-EK317/3 | A31701113 |
| TNF-α ELISA kit | Multi-Science | 70-EK382/3 | A38200623 |
| IL-6 ELISA kit | Multi-Science | 70-EK306/3 | A30610643 |
| PMA | Multi-Science | CS1001 | A10123 |
| BFA | Multi-Science | CS1002 | A01125 |
| BCG | Rebio Scientiﬁc | R19021 | 202010 |
| Universal qPCR Master Mix | New England Biolabs | M3003L | 10090983 |
| Anti-rat primary p65 antibody | ABclonal | A19653 | 4000000132 |
| Anti-rat primary p-p65 antibody | Affinity | AF3387 | 74z3198 |
| Anti-rat primary JNK antibody | ABclonal | A11119 | WH118576 |
| Anti-rat primary p-JNK antibody | ABclonal | AP0473 | WH110874 |
| Anti-rat primary CD43 antibody | Santa Cruz | Sc-53044 | G2417 |
| Anti-rat primary SIRT1 antibody | CST | D107 | 9475S |
| Anti-rat primary STAT3 antibody | Proteintech | 10253-2-AP | 00079764 |
| Anti-rat primary P-STAT3 antibody | Affinity | AF3294 | 77i8762 |
| Anti-rat primary CD3-FITC antibody | Thermo Fisher | 11-0030-82 | 2007720 |
| Anti-rat primary CD4-PE antibody | Thermo Fisher | 12-0040-82 | 2203513 |
| Anti-rat primary IL-17α-APC antibody | Thermo Fisher | 17-7177-81 | 2142931 |
| Anti-rat primary CD172a-FITC antibody | Thermo Fisher | MA1-90103 | VJ3111389F |
| Anti-rat primary CD43-PE antibody | Thermo Fisher | MA5-17386 | WA3174012 |
| Anti-rat primary CD86-PE antibody | Thermo Fisher | 12-0860-83 | 2172548 |
| Anti-rat primary CD11b-FITC antibody | Thermo Fisher | MA5-17509 | VF3007101 |
| ReverAid First Strand cDNA Synthesis kit | Thermo Fisher | K1622 | 00820611 |
| Hyclone RPMI-1640 | Thermo Fisher | SH30809.1 | AF32246309 |
| fetal bovine serum | Lonsa | S711-001S | QT08773 |
| phosphate buffered saline | Biosharp | BL302A | 21105885 |
| Anti-rabbit HRP-linked Antibody | Biosharp | BL003A | 21183464 |
| Anti-mouse HRP-linked Antibody | Affinity | S0002 | 78z0879 |
| BCA kit | Beyotime | P0012S | 122120210520 |
| penicillin-streptomycin | Beyotime | C0222 |  |
| Sample Loading Buffer | Beyotime | P0015L | 012521210318 |
| RIPA lysis buffer | Beyotime | P0013B | 030221210521 |
| Rat Whole blood Mononuclear Cell Isolation Fluid Kit | Solarbio | P9160 | 20210603 |
| Rat peripheral blood lymphocyte Isolation Kit | Solarbio | P8630 | 20210413 |
| Rat peripheral blood monocyte Isolation kit | Solarbio | P6700 | 20210112 |
| Antifade Mounting Medium | Beyotime | P0126 | 041420201014 |
| QuickBlockTM Bloking buffer | Beyotime | P0260 | 081820201015 |
| eBioscience™ Fixation/Permeabilization Concentrate | Thermo Fisher | 00-5123-43 | 2010090 |
| Red Blood Cell Lysis Buffer | Biosharp | BL503B | 21175764 |
| TRIzol reagent | Tiangen | DP424 | W9330 |
| Red donkey anti-rabbit IgG | Abbkine | A24421 | ATTSE2401 |
| Orange donkey anti-mouse IgG | Abbkine | A24311 | ATTAP0901 |
| Chemiluminescent HRP substrate kit | Millipore | WBKLS0100 | 2006401 |
| Sinomenine, SIN | Yuanye | B20997 | R19O10F100717 |
| Sophocarpine, SCA | Yuanye | B20544 | C18S10Q97803 |
| Matrine, MT | Yuanye | B20679 | T03F9F54046 |
| Pageruler Prestained Protein Ladder | Thermo Fisher | 26616 | 01012463 |
| DEPC-treated Water | Biosharp | BL510A | 71027223 |
| Freud’s adjuvant incomplete | Rebio | R19016 | A1020R19016 |
| MicroAmp™ Optical 8-Tube Strip | Thermo Fisher | 4316567 | I26D0q724 |
| PVDF membranes | MerckMillipore | IPVH00010 | R1AB92614 |
| Phosphatase inhibitor cocktail A | Beyotime | P1050 | 071320200918 |
| DAPI solution | Boster | AR1176 | 16G22C76 |
| Anti-rat primary SCF | ABclonal | A5672 | WH110873 |
| Anti-rat primary Flt-3L antibody | Affinity | DF7676 | 58x6376 |
| Anti-rat primary c-kit antibody | ABclonal | A0357 | WH103614 |

**Supplementary S2**

| Gene | FP(5-3) | RP(5-3) |
| --- | --- | --- |
| β-actin | TGTCCACCTTCCAGCAGATGT | AGCTCAGTAACAGTCCGCCTAGA |
| iNOS | TGCCTTTGCTCATGACATCG | AACACGTTCTTGGCGTGGA |
| IL-1β | TCCTCTGTGACTCGTGGGAT | TCAGACAGCACGAGGCATTT |
| MCP-1 | TTAATGCCCCACTCACCTGC | AGCTTCTTTGGGACACCTGC |
| IL-10 | AGTGGAGCAGGTGAAGAATGA | ATTTGCTGGTTCCCACACTC |
| Arg-1 | ACCCTGACCTATGCGTCATT | ATTCCCAGAGCTGGTTGTCA |
| SIRT1 | GTGTCATAGGTTAGGTGGCGAG | GAAGAGGTGTTGGTGGCAACTC |
| SCF | GATGACCTCGTGGCATGTATG | CAGGACCTAATGTTGAAGAGAG |

**Supplementary S3**

| **Normalization** | **Normal 1** | **Normal 2** | **CIA1** | **CIA2** | **QLY1** | **QLY2** |
| --- | --- | --- | --- | --- | --- | --- |
| POS1 | 371897 | 349867 | 313904 | 318255 | 310273 | 308166 |
| POS2 | 91679 | 97110 | 105976 | 104903 | 106871 | 107390 |
| 4-1BB | 3376 | 3084 | 3198 | 21132 | 6191 | 10654 |
| Activin A | 2150 | 3220 | 3538 | 3460 | 1777 | 2390 |
| Adiponectin | 593 | 749 | 721 | 692 | 799 | 673 |
| B7-1 | 1300 | 1325 | 1735 | 1420 | 1955 | 1217 |
| CD48 | 2597 | 2115 | 2494 | 16911 | 4007 | 8596 |
| CTACK | 677 | 884 | 1064 | 993 | 1169 | 978 |
| Decorin | 8698 | 7253 | 10246 | 27750 | 12888 | 16697 |
| Eotaxin | 86611 | 89806 | 109626 | 123568 | 113018 | 122294 |
| EphA5 | 2467 | 2892 | 4130 | 2272 | 3958 | 2694 |
| Erythropoietin | 653 | 619 | 631 | 556 | 569 | 627 |
| FGF-BP | 1382 | 1602 | 1806 | 1964 | 1775 | 1980 |
| Flt-3L | 27022 | 30493 | 33185 | 55299 | 31150 | 40462 |
| Galectin-1 | 16928 | 16827 | 24611 | 49484 | 25727 | 31352 |
| Galectin-3 | 1354 | 749 | 2028 | 1533 | 4573 | 1426 |
| Gas 1 | 44621 | 53960 | 56456 | 82771 | 62142 | 71853 |
| GFR alpha-1 | 4262 | 3805 | 3533 | 26656 | 6998 | 12347 |
| gp130 | 1862 | 2888 | 2133 | 2476 | 1858 | 2358 |
| HGF | 30515 | 30574 | 37970 | 67281 | 38591 | 53963 |
| IL-1 R6 | 2173 | 2929 | 2144 | 2439 | 2357 | 2067 |
| IL-1 ra | 2319 | 2829 | 2822 | 20416 | 3081 | 8563 |
| IL-2 Ra | 6635 | 5446 | 6090 | 35077 | 8643 | 18650 |
| IL-3 | 4429 | 4632 | 2677 | 24846 | 6234 | 14343 |
| IL-7 | 3590 | 3547 | 2696 | 24450 | 5347 | 12108 |
| IL-17F | 5516 | 4557 | 3619 | 45962 | 5923 | 24123 |
| IL-22 | 2440 | 2178 | 2851 | 15727 | 1778 | 9124 |
| JAM-A | 7882 | 10655 | 7203 | 14830 | 8004 | 11678 |
| MIP-1a | 237 | 388 | 265 | 259 | 292 | 382 |
| Neuropilin-1 | 3079 | 3577 | 4920 | 3874 | 4854 | 5160 |
| Neuropilin-2 | 6356 | 7473 | 10193 | 8702 | 9952 | 9459 |
| Nope | 32737 | 38926 | 35199 | 49026 | 34017 | 44052 |
| Notch-1 | 29321 | 32527 | 30791 | 44048 | 37380 | 40434 |
| Notch-2 | 186965 | 193646 | 190972 | 184874 | 184123 | 204494 |
| P-Cadherin | 3477 | 2681 | 2646 | 23062 | 3889 | 11445 |
| Prolactin | 12514 | 11776 | 12005 | 30624 | 14148 | 19097 |
| RANTES | 50925 | 54946 | 55617 | 58618 | 75873 | 69239 |
| SCF | 2765 | 2333 | 2381 | 17716 | 2610 | 6411 |
| TIM-1 | 1990 | 2274 | 3387 | 3320 | 2853 | 3334 |
| TIMP-2 | 538 | 685 | 574 | 589 | 572 | 590 |
| TREM-1 | 3199 | 3278 | 3135 | 10386 | 3479 | 5043 |
| TWEAK R | 28871 | 29138 | 36036 | 60149 | 38127 | 49311 |
| POS-Ave | 371897 | 371897 | 371897 | 371897 | 371897 | 371897 |

**Supplementary S4**


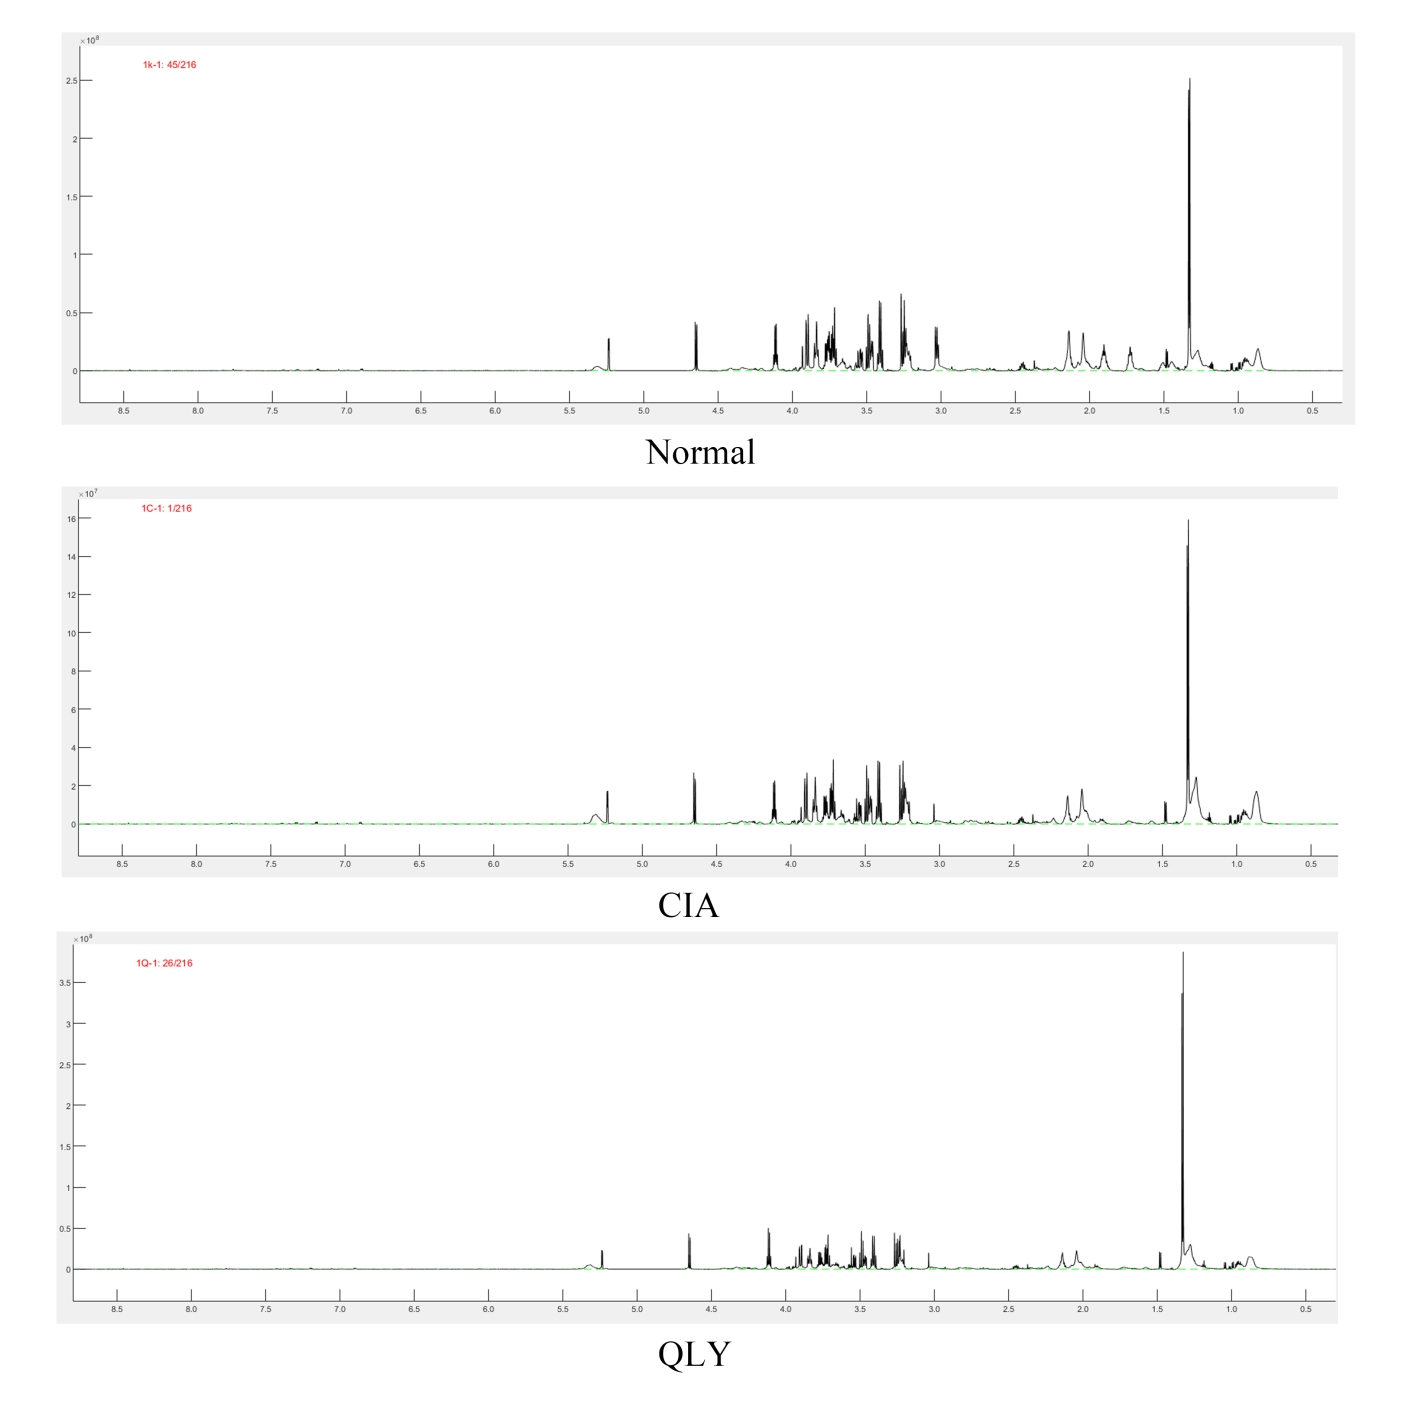


**Supplementary S5**


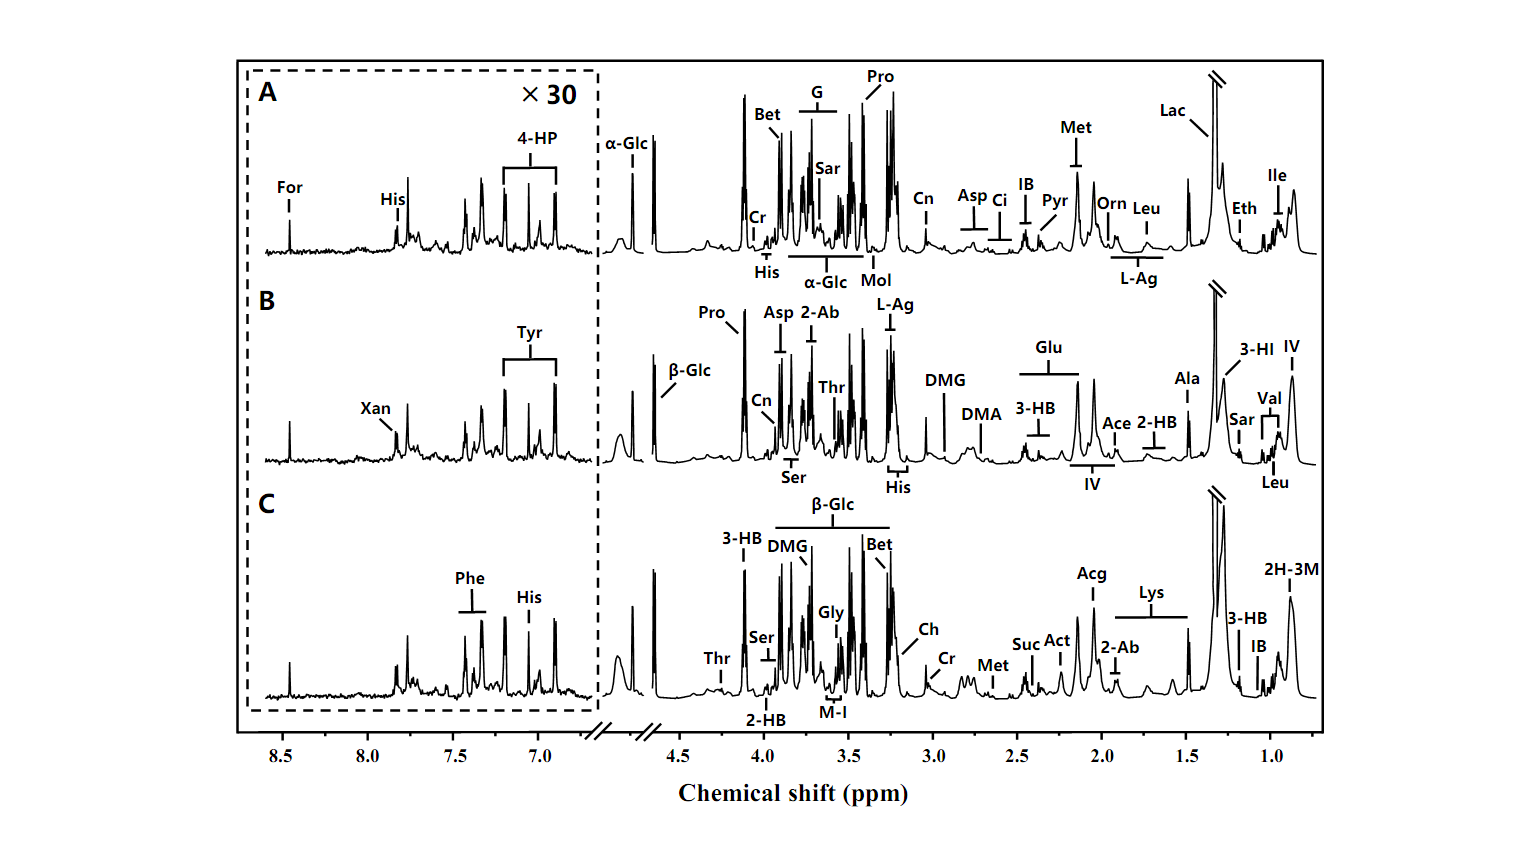


**Supplementary S6**


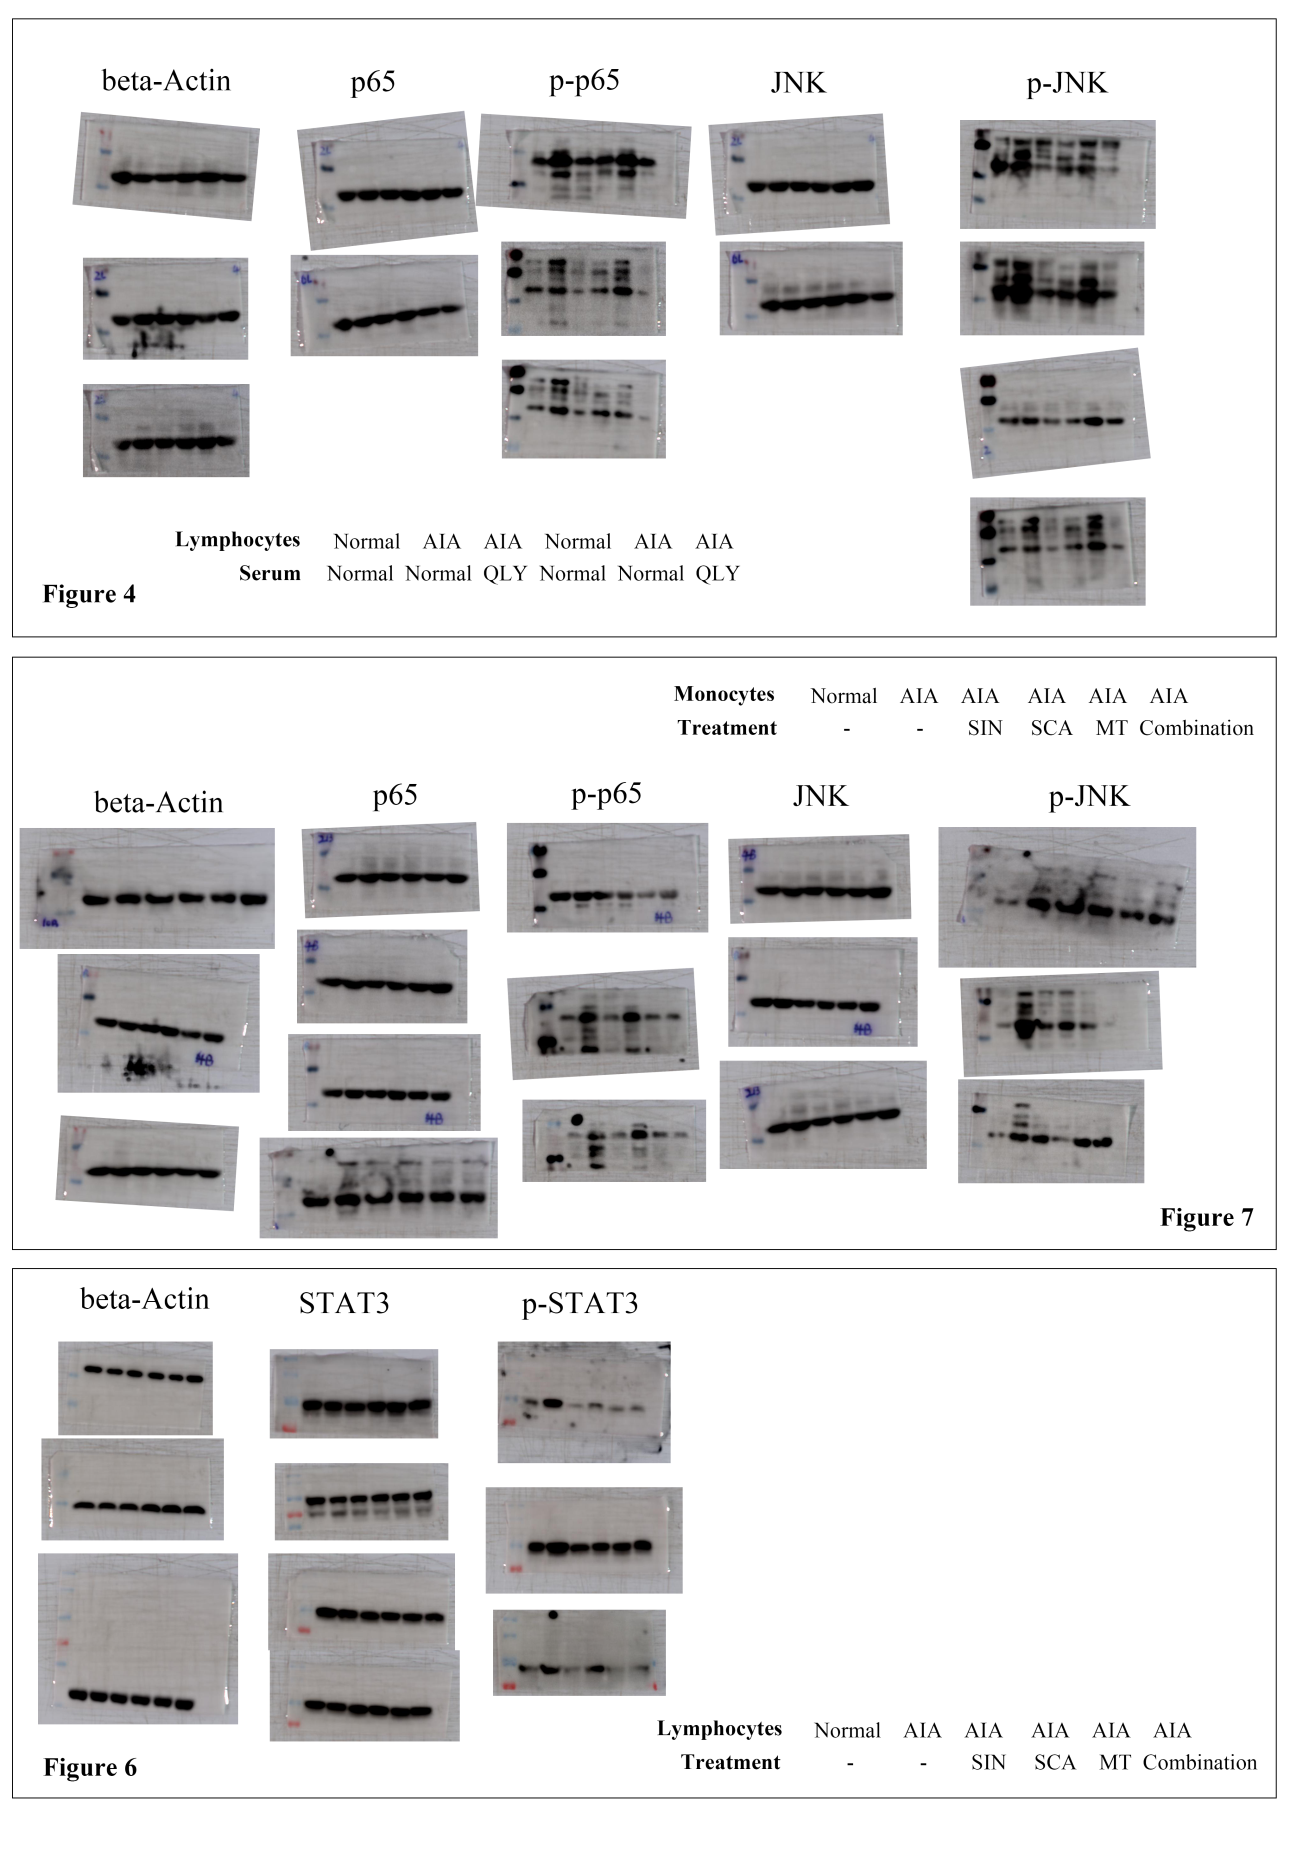


**Supplementary S7**

| Drug | ID | MolName |
| --- | --- | --- |
| Bixie | BX1 | EINECS 213-897-0 |
| Huangbo | A1 | beta-sitosterol |
| Qingfengteng | A1 | beta-sitosterol |
| Huangbo | A2 | Magnograndiolide |
| Qingfengteng | A2 | Magnograndiolide |
| Huangbo | B | quercetin |
| Kusheng | B | quercetin |
| Bixie | BX2 | diosgenin |
| Huangbo | HB1 | berberine |
| Huangbo | HB10 | Worenine |
| Huangbo | HB11 | Cavidine |
| Huangbo | HB12 | Hericenone H |
| Huangbo | HB13 | palmatine |
| Huangbo | HB14 | Fumarine |
| Huangbo | HB15 | Isocorypalmine |
| Huangbo | HB16 | phellamurin_qt |
| Huangbo | HB17 | (S)-Canadine |
| Huangbo | HB18 | poriferast-5-en-3beta-ol |
| Huangbo | HB19 | berberrubine |
| Huangbo | HB2 | coptisine |
| Huangbo | HB20 | campesterol |
| Huangbo | HB21 | thalifendine |
| Huangbo | HB22 | Stigmasterol |
| Huangbo | HB3 | Phellavin_qt |
| Huangbo | HB4 | delta 7-stigmastenol |
| Huangbo | HB5 | Phellopterin |
| Huangbo | HB6 | Dehydrotanshinone II A |
| Huangbo | HB7 | rutaecarpine |
| Huangbo | HB8 | Skimmianin |
| Huangbo | HB9 | Chelerythrine |
| Kusheng | KS1 | (2R)-5,7-dihydroxy-2-(4-hydroxyphenyl)chroman-4-one |
| Kusheng | KS10 | (2R)-7-hydroxy-2-(4-hydroxyphenyl)chroman-4-one |
| Kusheng | KS11 | 5,7-dihydroxy-2-(3-hydroxy-4-methoxyphenyl)chroman-4-one |
| Kusheng | KS12 | matrine |
| Kusheng | KS13 | luteolin |
| Kusheng | KS14 | Glyceollin |
| Kusheng | KS15 | hyperforin |
| Kusheng | KS16 | (2S)-7-hydroxy-2-(4-hydroxyphenyl)-5-methoxy-8-(3-methylbut-2-enyl)chroman-4-one |
| Kusheng | KS17 | kushenin |
| Kusheng | KS18 | kushenol J_qt |
| Kusheng | KS19 | kushenol,t |
| Kusheng | KS2 | Inermine |
| Kusheng | KS20 | leachianone,g |
| Kusheng | KS21 | Norartocarpetin |
| Kusheng | KS22 | Phaseolin |
| Kusheng | KS3 | 8-Isopentenyl-kaempferol |
| Kusheng | KS4 | sophocarpine |
| Kusheng | KS5 | Inermin |
| Kusheng | KS6 | Wighteone |
| Kusheng | KS7 | sophoridine |
| Kusheng | KS8 | formononetin |
| Kusheng | KS9 | cis-Dihydroquercetin |
| Qingfengteng | QFT1 | 16-epi-Isositsirikine |
| Qingfengteng | QFT2 | Michelenolide |
| Qingfengteng | QFT3 | Sinomenine |
| Qingfengteng | QFT4 | Stepholidine |

**Supplementary S8**

Standard

SIN

SCA

MT

Blank

Qualification curve

SIN

SCA

MT

Sample

SIN

SCA

MT
